# Supplementary material for: Comparison of DNA quantification methodology used in the DNA extraction protocol for the UK Biobank cohort
Source: PubMed Central journal article supplement (PMC5217214; doi:10.1186/s12864-016-3391-x), 2017-01-05

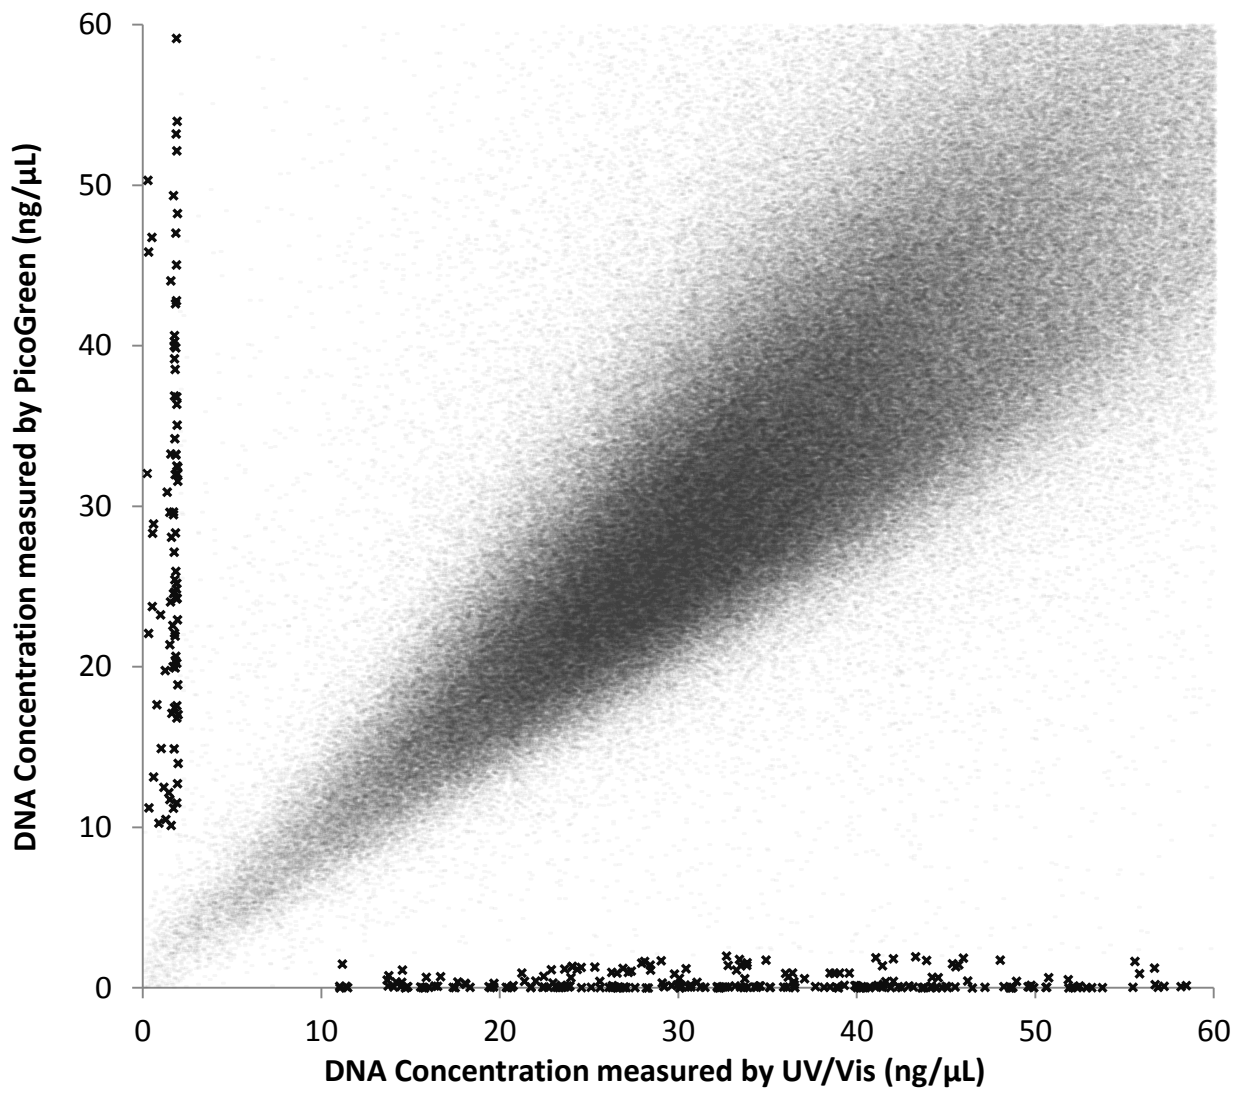

Supplement: 12864_2016_3391_MOESM1_ESM.pdf [file 12864_2016_3391_MOESM1_ESM.pdf]
